# Supplementary material
Source: publisher figshare collection journal article supplement (https://acs.figshare.com/ndownloader/files/4645159)

Supporting Information Available for

**Design and Synthesis of A Caged Zn<sup>2+</sup> Probe,  
8-Benzenesulfonyloxy-5-*N,N*-dimethylaminosulfonylquinolin-2-ylmethyl-pendant  
1,4,7,10-Tetraazacyclododecane, and Its Hydrolytic Uncaging upon Complexation  
with Zn<sup>2+</sup>.**

**Shin Aoki,<sup>\*,†,‡</sup> Kazusa Sakurama,<sup>§</sup> Ryosuke Ohshima,<sup>†</sup> Nanako Matsuo,<sup>†</sup> Yasuyuki  
Yamada,<sup>†,‡</sup> Ryoko Takasawa,<sup>†</sup> Sei-ichi Tanuma,<sup>†</sup> Kei Takeda,<sup>§</sup> and Eiichi Kimura<sup>#</sup>**

*Faculty of Pharmaceutical Sciences, Tokyo University of Science,*

*2641 Yamazaki, Noda 278-8510 Japan,*

*Center for Drug Delivery Research, Tokyo University of Science,*

*2641 Yamazaki, Noda 278-8510 Japan,*

*Division of Medicinal Chemistry, Graduate School of Biomedical Sciences,*

*Hiroshima University, 1-2-3 Kasumi, Minami-ku, Hiroshima, 734-8551 Japan,*

*And Department of Chemistry, Shizuoka University*

*836 Ohya, Suruga-ku, Shizuoka, 422-8529 Japan*

<sup>†</sup> Faculty of Pharmaceutical Sciences, Tokyo University of Science

<sup>‡</sup> Center for Drug Delivery Research, Tokyo University of Science

<sup>§</sup> Graduate School of Biomedical Sciences, Hiroshima University

<sup>#</sup> Department of Chemistry, Shizuoka University

<sup>\*</sup> To whom correspondence should be addressed.

Shin Aoki : shinaoki@rs.noda.tus.ac.jp

**Figure S1.** Formation of a  $\text{Zn}^{2+}$  complex of **8** ( $50\ \mu\text{M}$ ) followed by  $\varepsilon$  at 274 nm upon addition of  $50\ \mu\text{M}\ \text{Zn}^{2+}$  (a),  $250\ \mu\text{M}\ \text{Zn}^{2+}$  (b), and  $500\ \mu\text{M}\ \text{Zn}^{2+}$  (c) at pH 7.4 (10 mM HEPES with  $I = 0.1$  ( $\text{NaNO}_3$ )) and  $25\ ^\circ\text{C}$ .

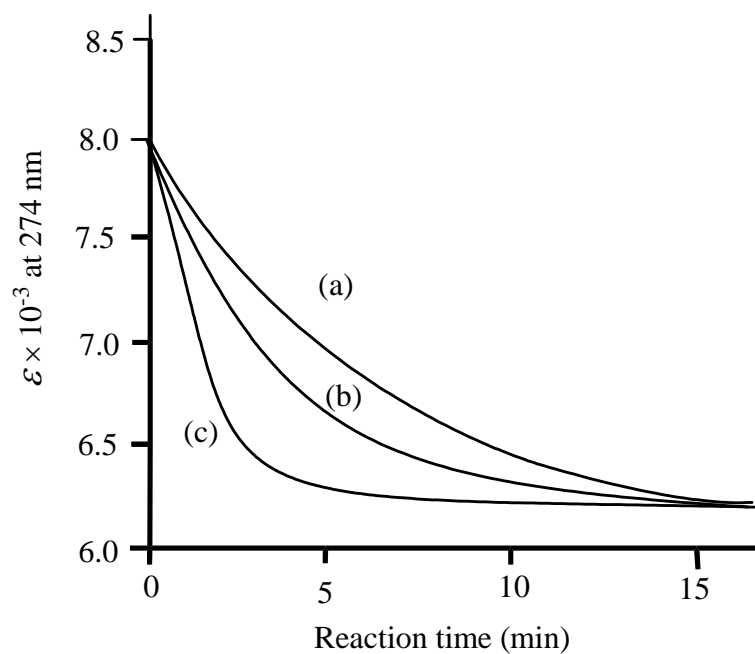

**Figure S2.** Hydrolysis of 4-nitrophenyl acetate (100  $\mu\text{M}$ ) in the presence of 100  $\mu\text{M}$  **1** ( $\text{ZnL}^1$ ) (plain curve) and 100  $\mu\text{M}$  **2** ( $\text{CdL}^1$ ) (dashed curve) in 10/90  $\text{CH}_3\text{CN}/10\text{ mM TAPS}$  (pH 8.4 with  $I = 0.1$  ( $\text{NaNO}_3$ )) at 25  $^\circ\text{C}$ .  $C_0$  = initial concentration of 4NPA  $C_X$  = concentration of formed 4-nitrophenolate. The  $\log \varepsilon$  value of 4-nitrophenolate at 400 nm is 4.24 at pH 8.4 (ref. 33 in the text).

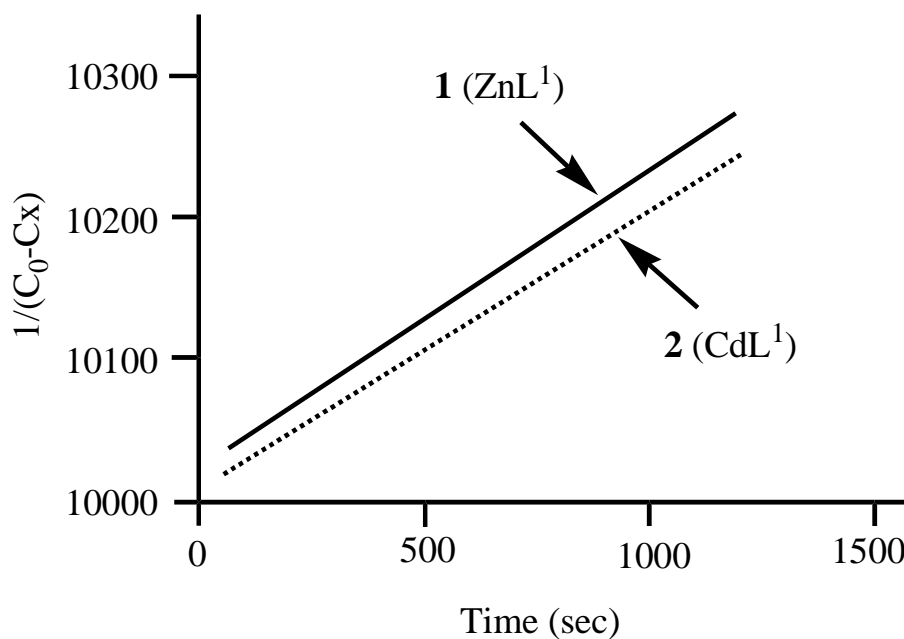

**Figure S3.** The  $1/T$ -  $\ln(k_2/T)$ -profile for the hydrolysis of 4NPA (50  $\mu\text{M}$ ) catalyzed by 100  $\mu\text{M}$  **1** ( $\text{ZnL}^1$ ) (closed circles) and 100  $\mu\text{M}$  **2** ( $\text{CdL}^1$ ) (closed squares) in 10/90  $\text{CH}_3\text{CN}/10$  mM TAPS (pH 8.4) with  $I = 0.1$  ( $\text{NaNO}_3$ ).

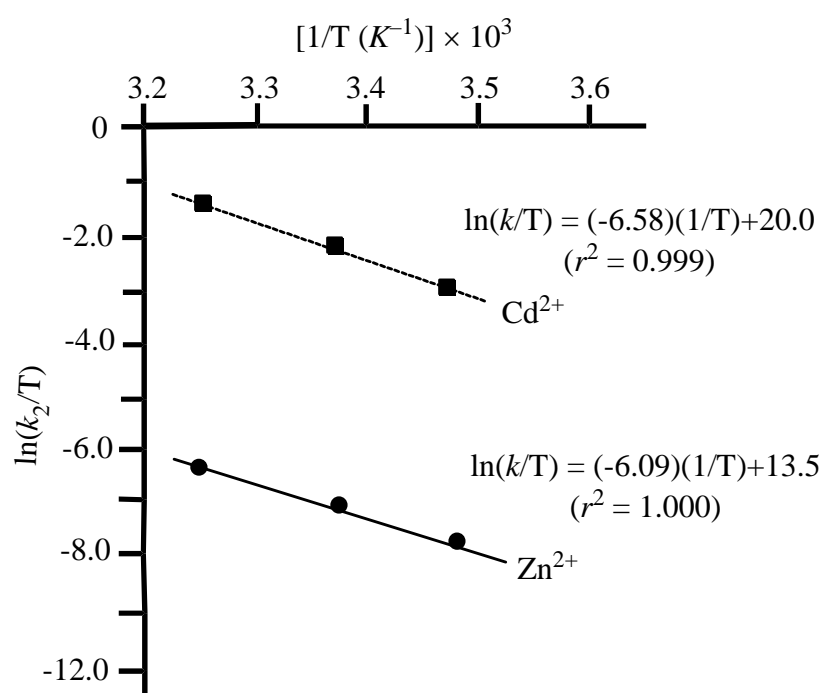

Supplement: Supplementary file 1 [file 4645159]
